# Supplementary material
Source: PubMed Central journal article supplement (PMC7462020)
Supplement: Supp_Table5.pdf [file Supp_Table5.pdf]

SUPPLEMENTARY TABLE S5A.

|                                | <i>Left hemisphere cortical region</i> |             |          |                 |             |          |                 |             |          |                 |             |          |                  |             |          |
|--------------------------------|----------------------------------------|-------------|----------|-----------------|-------------|----------|-----------------|-------------|----------|-----------------|-------------|----------|------------------|-------------|----------|
|                                | <i>Frontal</i>                         |             |          | <i>Cingulum</i> |             |          | <i>Temporal</i> |             |          | <i>Parietal</i> |             |          | <i>Occipital</i> |             |          |
|                                | <i>Statistic*</i>                      |             |          |                 |             |          |                 |             |          |                 |             |          |                  |             |          |
|                                | <i>z</i>                               | <i>p</i>    | <i>B</i> | <i>z</i>        | <i>p</i>    | <i>B</i> | <i>z</i>        | <i>p</i>    | <i>B</i> | <i>z</i>        | <i>p</i>    | <i>B</i> | <i>z</i>         | <i>p</i>    | <i>B</i> |
| Post-acute child cognitive PCS |                                        |             |          |                 |             |          |                 |             |          |                 |             |          |                  |             |          |
| Group                          | 2.73                                   | <b>.006</b> | 0.32     | 2.79            | <b>.005</b> | 0.32     | 2.89            | <b>.004</b> | 0.34     | 2.70            | <b>.007</b> | 0.32     | 3.11             | <b>.002</b> | 0.36     |
| Average Thickness              | 0.06                                   | .952        | 0.04     | 0.73            | .465        | 0.42     | -0.44           | .657        | -0.24    | 0.44            | .661        | 0.31     | -1.75            | .080        | -1.14    |
| Age                            | 1.64                                   | .101        | 0.04     | 1.24            | .215        | 0.03     | 1.25            | .210        | 0.03     | 1.19            | .233        | 0.03     | 1.12             | .262        | 0.02     |
| Sex                            | -0.10                                  | .918        | -0.01    | -0.04           | .966        | <0.01    | -0.05           | .960        | -0.01    | -0.06           | .948        | -0.01    | <0.01            | .998        | <0.01    |
| Pre-morbid HBI                 | 1.32                                   | .188        | 0.01     | 1.35            | .178        | 0.01     | 1.32            | .188        | 0.01     | 1.29            | .197        | 0.01     | 1.03             | .303        | 0.01     |
| Group × average thickness      | 0.49                                   | .622        | 0.40     | -0.94           | .346        | -0.63    | -0.10           | .921        | -0.07    | -0.55           | .586        | -0.47    | 1.32             | .187        | 1.07     |
| 3-Month child cognitive PCS    |                                        |             |          |                 |             |          |                 |             |          |                 |             |          |                  |             |          |
| Group                          | 0.32                                   | .745        | 0.06     | 0.24            | .807        | 0.04     | 0.22            | .825        | 0.04     | 0.23            | .815        | 0.04     | 0.39             | .699        | 0.07     |
| Average thickness              | 1.14                                   | .255        | 1.15     | 0.65            | .516        | 0.56     | 0.28            | .783        | 0.23     | 0.91            | .364        | 0.91     | -1.04            | .298        | -1.09    |
| Age                            | 1.89                                   | .058        | 0.07     | 1.76            | .079        | 0.06     | 1.58            | .113        | 0.05     | 1.40            | .160        | 0.05     | 1.02             | .307        | 0.04     |
| Sex                            | -0.45                                  | .652        | -0.08    | -0.48           | .628        | -0.09    | -0.46           | .643        | -0.08    | -0.40           | .686        | -0.07    | -0.30            | .767        | -0.05    |
| Pre-morbid HBI                 | 3.13                                   | <b>.002</b> | 0.04     | 3.26            | <b>.001</b> | 0.04     | 3.21            | <b>.001</b> | 0.04     | 3.13            | <b>.002</b> | 0.04     | 2.71             | <b>.007</b> | 0.03     |
| Group × average thickness      | -0.58                                  | .563        | -0.72    | -0.49           | .627        | -0.50    | -1.08           | .282        | -1.22    | -1.04           | .300        | -1.37    | 0.22             | .829        | 0.28     |
| 6-Month child cognitive PCS    |                                        |             |          |                 |             |          |                 |             |          |                 |             |          |                  |             |          |
| Group                          | -0.52                                  | .601        | -0.10    | -0.59           | .553        | -0.12    | -0.64           | .520        | -0.12    | -0.45           | .655        | -0.09    | -0.41            | .682        | -0.08    |
| Average thickness              | 1.40                                   | .161        | 1.72     | 0.11            | .909        | 0.12     | 0.39            | .694        | 0.36     | -0.04           | .967        | -0.05    | -1.22            | .222        | -1.39    |
| Age                            | 1.30                                   | .195        | 0.05     | 1.21            | .226        | 0.05     | 1.37            | .171        | 0.05     | 0.97            | .331        | 0.04     | 1.00             | .315        | 0.04     |
| Sex                            | -0.55                                  | .582        | -0.11    | -0.51           | .610        | -0.10    | -0.59           | .557        | -0.12    | -0.48           | .630        | -0.10    | -0.51            | .608        | -0.10    |
| Pre-morbid HBI                 | 3.11                                   | <b>.002</b> | 0.04     | 3.22            | <b>.001</b> | 0.04     | 3.10            | <b>.002</b> | 0.04     | 3.15            | <b>.002</b> | 0.04     | 2.84             | <b>.005</b> | 0.04     |
| Group × average thickness      | -1.67                                  | .096        | -2.38    | -0.62           | .538        | -0.72    | -1.56           | .118        | -1.86    | -0.68           | .497        | -1.00    | 0.87             | .383        | 1.22     |

Italic=unadjusted *p* value <0.05.

Bolded=FDR adjusted *p* value <0.05.

PCS, post-concussive symptoms; HBI, Health and Behavior Inventory.

SUPPLEMENTARY TABLE S5B.

|                                | <i>Right hemisphere cortical region</i> |             |          |                 |             |          |                 |             |          |                 |             |          |                  |             |          |
|--------------------------------|-----------------------------------------|-------------|----------|-----------------|-------------|----------|-----------------|-------------|----------|-----------------|-------------|----------|------------------|-------------|----------|
|                                | <i>Frontal</i>                          |             |          | <i>Cingulum</i> |             |          | <i>Temporal</i> |             |          | <i>Parietal</i> |             |          | <i>Occipital</i> |             |          |
|                                | <i>Statistic*</i>                       |             |          |                 |             |          |                 |             |          |                 |             |          |                  |             |          |
|                                | <i>z</i>                                | <i>p</i>    | <i>B</i> | <i>z</i>        | <i>p</i>    | <i>B</i> | <i>z</i>        | <i>p</i>    | <i>B</i> | <i>z</i>        | <i>p</i>    | <i>B</i> | <i>z</i>         | <i>p</i>    | <i>B</i> |
| Post-acute child cognitive PCS |                                         |             |          |                 |             |          |                 |             |          |                 |             |          |                  |             |          |
| Group                          | 2.68                                    | <b>.007</b> | 0.31     | 2.85            | <b>.004</b> | 0.33     | 2.91            | <b>.004</b> | 0.34     | 3.00            | <b>.003</b> | 0.35     | 2.93             | <b>.003</b> | 0.34     |
| Average thickness              | 0.52                                    | .602        | 0.29     | 1.20            | .231        | 0.62     | -0.30           | .762        | -0.17    | -0.85           | .396        | -0.63    | -1.21            | .227        | -0.78    |
| Age                            | 1.52                                    | .130        | 0.04     | 1.20            | .229        | 0.03     | 1.17            | .242        | 0.02     | 0.99            | .320        | 0.02     | 1.28             | .200        | 0.03     |
| Sex                            | -0.08                                   | .939        | -0.01    | -0.08           | .935        | -0.01    | -0.06           | .954        | -0.01    | <0.01           | .999        | <0.01    | <0.01            | .996        | <0.01    |
| Pre-morbid HBI                 | 1.21                                    | .228        | 0.01     | 1.36            | .174        | 0.01     | 1.25            | .213        | 0.01     | 1.36            | .175        | 0.01     | 1.05             | .292        | 0.01     |
| Group × average thickness      | -0.10                                   | .918        | -0.07    | -1.64           | .101        | -1.01    | -0.47           | .636        | -0.34    | 0.32            | .746        | 0.29     | 1.17             | .243        | 0.92     |
| 3-Month child cognitive PCS    |                                         |             |          |                 |             |          |                 |             |          |                 |             |          |                  |             |          |
| Group                          | 0.21                                    | .837        | 0.04     | 0.52            | .607        | 0.09     | 0.30            | .763        | 0.05     | 0.32            | .752        | 0.06     | 0.25             | .801        | 0.04     |
| Average thickness              | 0.78                                    | .438        | 0.64     | 2.12            | <b>.034</b> | 1.62     | -0.32           | .750        | -0.28    | 0.24            | .807        | 0.28     | -0.47            | .639        | -0.48    |
| Age                            | 1.89                                    | .059        | 0.07     | 2.09            | <b>.036</b> | 0.07     | 1.48            | .139        | 0.05     | 1.18            | .240        | 0.04     | 1.55             | .122        | 0.06     |
| Sex                            | -0.34                                   | .734        | -0.06    | -0.33           | .743        | -0.06    | -0.52           | .601        | -0.09    | -0.42           | .673        | -0.08    | -0.48            | .629        | -0.09    |
| Pre-morbid HBI                 | 2.96                                    | <b>.003</b> | 0.03     | 3.06            | <b>.002</b> | 0.04     | 3.25            | <b>.001</b> | 0.04     | 3.26            | <b>.001</b> | 0.04     | 2.99             | <b>.003</b> | 0.04     |
| Group × average thickness      | -0.18                                   | .859        | -0.18    | -1.72           | .086        | -1.55    | -0.68           | .496        | -0.78    | -0.83           | .407        | -1.20    | 0.54             | .587        | 0.69     |
| 6-Month child cognitive PCS    |                                         |             |          |                 |             |          |                 |             |          |                 |             |          |                  |             |          |
| Group                          | -0.68                                   | .494        | -0.14    | 0.01            | .991        | <0.01    | -0.53           | .598        | -0.11    | -0.57           | .568        | -0.12    | -0.64            | .524        | -0.12    |
| Average thickness              | 1.94                                    | .052        | 1.83     | 2.75            | <b>.006</b> | 2.33     | -0.19           | .851        | -0.18    | <0.01           | .999        | <0.01    | -0.91            | .365        | -1.01    |
| Age                            | 1.25                                    | .210        | 0.05     | 1.70            | .090        | 0.06     | 1.45            | .148        | 0.05     | 1.34            | .181        | 0.05     | 1.57             | .117        | 0.06     |
| Sex                            | -0.43                                   | .667        | -0.09    | -0.35           | .723        | -0.07    | -0.53           | .594        | -0.11    | -0.54           | .590        | -0.11    | -0.62            | .533        | -0.13    |
| Pre-morbid HBI                 | 2.98                                    | <b>.003</b> | 0.04     | 3.28            | <b>.001</b> | 0.04     | 3.18            | <b>.001</b> | 0.04     | 3.27            | <b>.001</b> | 0.04     | 3.20             | <b>.001</b> | 0.04     |
| Group × average thickness      | -2.40                                   | <b>.017</b> | -2.70    | -2.98           | <b>.003</b> | -2.94    | -0.19           | .847        | -0.23    | -0.10           | .924        | -0.15    | 1.41             | .158        | 1.92     |

Italic=unadjusted *p* value <0.05.

Bolded=false discovery rate adjusted *p* value <0.05.

PCS, post-concussive symptoms; HBI, Health and Behavior Inventory.
